# Supplementary material
Source: PubMed Central journal article supplement (PMC3067467)
Supplement: supp_10_3_384__1.pdf [file supp_10_3_384__1.pdf]

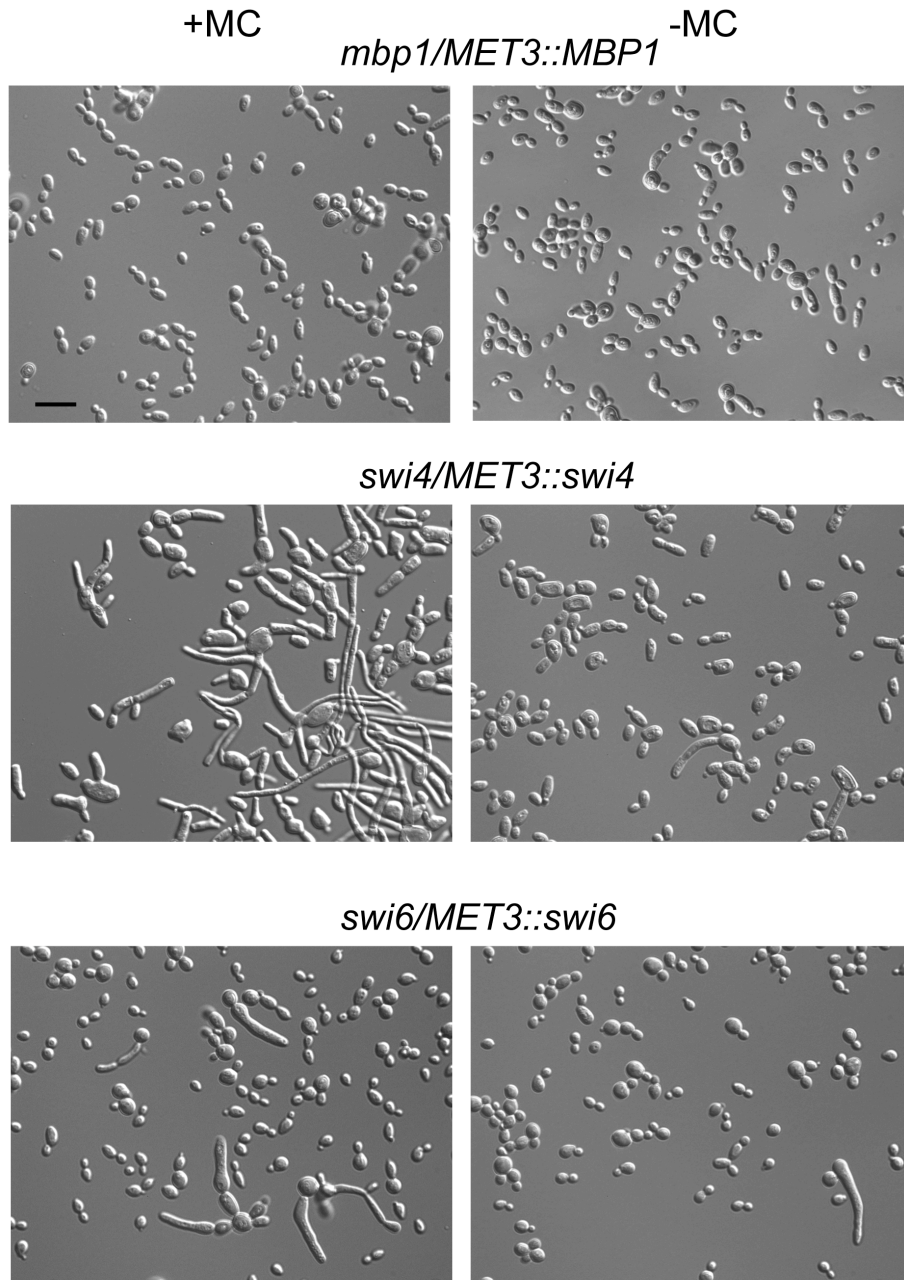

**Fig. S1: Repression of *MBP1*, *SWI4* or *SWI6* results in phenotypes similar to deletion of the genes.** Strains KmCa4 (*mbp1* $\Delta$ ::*URA3/MET3::MBP1*), CB557 (*swi6* $\Delta$ ::*URA3/MET3::SWI6*), and CB547 (*swi4* $\Delta$ ::*URA3/MET3::SWI4*) were grown in inducing medium (-MC) overnight, then incubated in fresh inducing or repressing medium (+MC) for 5-7h at 30°C. Bar: 10  $\mu$ m.
